# Supplementary material for: Effects of betaine on ileal tissue and intestinal microbial metabolism in Tibetan sheep
Source: Research Square preprint supplement (doi:10.21203/rs.3.rs-7277025/v1), 2025-08-12
Supplement: Supplementary file 1 [file 037496a46eebeca226db8000.docx]

Table S1. Comparison of the levels of 14 metabolites between the Ctrl and Bet sample groups.

| Name | Ctrl1 | Ctrl2 | Ctrl3 | Ctrl4 | Ctrl5 | Ctrl6 | Bet1 | Bet2 | Bet3 | Bet4 | Bet5 | Bet6 |
| --- | --- | --- | --- | --- | --- | --- | --- | --- | --- | --- | --- | --- |
| 1-Methyladenosine | 51363696.11 | 62741751.41 | 54654925.16 | 22084267.79 | 39268183.43 | 22309455.64 | 5009461.34 | 21212530.09 | 13174851.83 | 17859529.03 | 7085605.889 | 20019587.6 |
| Cer 18:1;2O/24:2 | 1188726.845 | 1205344.86 | 977962.5283 | 1595593.369 | 1136702.084 | 1342406.255 | 4882441.142 | 3726323.958 | 2727656.836 | 4197491.192 | 2170792.996 | 1248423.752 |
| Ala-trp | 35226745.52 | 38958387.45 | 26501201.46 | 22275996.22 | 30008233.8 | 24352086.81 | 12316957.19 | 23305318.39 | 16174774.8 | 17669394.72 | 23455714.86 | 20643387.89 |
| Cer 18:1;2O/18:0 | 11182742.09 | 1098354.332 | 319269.7355 | 6237754.98 | 462643.5523 | 9970454.452 | 460006200.5 | 4797456.977 | 43420017.85 | 31291291.14 | 6922136.755 | 25332917.27 |
| 2-(tert-butyl)-1,3-thiazolane-4-carboxylic acid | 3215903.701 | 26192569.41 | 407061081.8 | 2237702.878 | 114258289.9 | 22876417.18 | 2149154.628 | 1510233.766 | 3349674.984 | 1787481.397 | 1056410.672 | 2923142.495 |
| DGDG O-8:0_22:1 | 10027228.26 | 7650757.153 | 6125134.622 | 9490981.55 | 4502890.863 | 10357698.86 | 21404896.78 | 7186520.79 | 11048626.21 | 19064866.13 | 10580448.45 | 13539110.89 |
| PC 16:0_17:2 | 9023597.954 | 1933675.797 | 1981519.321 | 2934638.503 | 3225310.067 | 1006458.282 | 940522.3747 | 1643771.239 | 683133.7539 | 1110024.755 | 948632.7548 | 1934310.072 |
| MGMG (18:2) | 1080431.7 | 526192.129 | 1452338.454 | 790516.0582 | 1324101.327 | 606856.2788 | 836304.1998 | 387208.3952 | 539537.2507 | 665440.7027 | 573951.706 | 411305.191 |
| (±)13-HpODE | 877339.0178 | 885143.0599 | 444699.712 | 1367815.863 | 274017.0184 | 849660.3527 | 1181714.792 | 656061.3708 | 1611932.93 | 1764911.983 | 1745357.737 | 1516844.352 |
| PS 18:0_18:1 | 23362284.29 | 802542.2242 | 6727714.392 | 944155.145 | 2398048.154 | 8913354.957 | 692260.2824 | 1222159.267 | 507916.3254 | 1145091.293 | 705317.312 | 1279387.438 |
| SPB 19:0;2O | 189893576.7 | 489238070.4 | 260785180.9 | 457725589.6 | 223552984.8 | 142799382 | 819829724.1 | 705998426.3 | 172886465.3 | 706056193 | 1116926942 | 454463051.5 |
| L-arginine | 61749068.26 | 73359190.08 | 97503210.37 | 47592671.3 | 84346790.09 | 66074262.87 | 23934275.15 | 63648332.52 | 53466256.98 | 59429840 | 20181413.55 | 48480492.75 |
| LPA 22:5 | 27114646.74 | 22431454.23 | 5964809.869 | 1308459.697 | 6223784.254 | 1333790.357 | 1987644.046 | 4709082.549 | 1056567.414 | 1778590.458 | 498449.7522 | 749767.6197 |
| N-Acetyl-DL-glutamic acid | 86847004.68 | 21232015.49 | 13052713.78 | 75554101.61 | 5881668.668 | 56163506.13 | 163197613.1 | 50261153.23 | 64669731.23 | 195567430.9 | 58741558.36 | 105537566.6 |

Ctrl, basal diet; Bet, 0.08% betaine is added to the basal diet.
